# Supplementary material for: Phillygenin Attenuates Carbon Tetrachloride-Induced Liver Fibrosis via Modulating Inflammation and Gut Microbiota
Source: Frontiers journal article supplement (doi:10.3389/fphar.2021.756924), 2021-09-21
Supplement: Data_Sheet_1.ZIP [file Gut microbiota.xlsx]

## Sheet: Sheet1
Chao 1 index	Normal control	Solvent control	CCl4	CCl4 + 10 mg/kg PHI	CCl4 + 20 mg/kg PHI	CCl4 + 40 mg/kg PHI
	338.364	301.023	341	365.468	344.636	324.031
	337.036	304.182	353.375	352.692	337.783	293.091
	357.341	233.167	335.923	285.107	354.516	406.583
	332.412	304.088	382.966	309.097	312.539	248.125
	329.583	329.232	378.961	360	253.108	340.561
	322.353	318.667	412.23	255.167	274.316	248
Shannon index	Normal control	Solvent control	CCl4	CCl4 + 10 mg/kg PHI	CCl4 + 20 mg/kg PHI	CCl4 + 40 mg/kg PHI
	5.5798	5.1845	5.9858	5.1123	5.0935	5.6495
	4.2369	4.8131	6.0812	5.0514	5.454	5.8665
	5.134	5.2351	6.0658	5.2995	5.6759	5.4098
	4.0172	5.4291	5.7185	6.0043	5.2735	4.8542
	5.6194	5.2984	6.2299	5.6559	5.0834	5.5541
	5.2032	5.6641	6.6042	5.3618	4.9235	5.2272
Simpson index	Normal control	Solvent control	CCl4	CCl4 + 10 mg/kg PHI	CCl4 + 20 mg/kg PHI	CCl4 + 40 mg/kg PHI
	0.9626	0.9407	0.9533	0.967	0.9097	0.9788
	0.9029	0.9107	0.9696	0.9652	0.967	0.9554
	0.9419	0.9601	0.9658	0.9459	0.9652	0.9563
	0.9033	0.9617	0.957	0.9572	0.9459	0.9468
	0.9597	0.929	0.9311	0.9323	0.9572	0.9636
	0.9505	0.9643	0.9742	0.9351	0.9351	0.9328
Firmicutes	Normal control	Solvent control	CCl4	CCl4 + 10 mg/kg PHI	CCl4 + 20 mg/kg PHI	CCl4 + 40 mg/kg PHI
	48.7748	46.4658	35.0932	40.3506	60.9082	51.911
	42.5404	50.2801	46.5068	37.8062	58.6461	51.0254
	47.2763	43.5953	40.5075	45.7805	48.2984	54.626
	42.3278	44.7709	36.2179	41.3577	47.449	30.767
	48.0493	52.9521	34.1302	29.5246	39.1872	53.701
	45.4621	43.7326	42.7036	51.3056	54.1529	40.0158
Bacteroidetes	Normal control	Solvent control	CCl4	CCl4 + 10 mg/kg PHI	CCl4 + 20 mg/kg PHI	CCl4 + 40 mg/kg PHI
	44.7147	44.278	53.2508	52.8901	33.2511	38.056
	51.0918	35.8894	40.7107	45.8302	23.7994	35.9866
	46.0821	52.9506	50.3329	42.2875	37.6274	38.9466
	48.9553	39.2144	54.0545	50.9151	42.4877	49.3767
	45.6194	35.104	49.8474	35.417	44.6563	30.3757
	48.526	41.8698	39.6743	42.6177	35.3034	44.9128
Proteobacteria	Normal control	Solvent control	CCl4	CCl4 + 10 mg/kg PHI	CCl4 + 20 mg/kg PHI	CCl4 + 40 mg/kg PHI
	2.34305	4.13295	2.41266	4.05875	1.80981	4.89292
	3.55059	2.55602	5.50285	6.08565	0.950664	4.32933
	2.25748	0.836147	6.67626	6.67697	3.67237	1.98473
	4.11361	2.47485	4.39103	2.14297	2.46305	1.56915
	1.59138	2.43614	2.08545	3.81917	3.96387	6.65068
	1.24213	3.16852	7.32899	1.78917	2.08038	8.28843
Bacteroidetes/Firmicutes	Normal control	Solvent control	CCl4	CCl4 + 10 mg/kg PHI	CCl4 + 20 mg/kg PHI	CCl4 + 40 mg/kg PHI
	0.916758	0.952916	1.51741	1.31076	0.545921	0.733101
	1.20102	0.713788	0.875371	1.21224	0.405813	0.705269
	0.97474	1.24311	1.24256	0.9237	0.779061	0.712968
	1.15658	0.875892	1.49248	1.23109	0.895439	1.60486
	0.94943	0.662939	1.46051	1.19958	1.13956	0.565645
	1.0674	0.957404	0.929062	0.830663	0.651921	1.12238
Ruminococcaceae _UCG-014	Normal control	Solvent control	CCl4	CCl4 + 10 mg/kg PHI	CCl4 + 20 mg/kg PHI	CCl4 + 40 mg/kg PHI
	8.5316	1.6829	4.9977	1.7846	17.3412	4.46458
	4.6841	5.1296	1.9665	7.9489	12.9159	2.91603
	11.3038	5.0651	0.7018	2.272	10.6518	4.16483
	4.4891	11.2087	5.016	8.7439	8.779	3.72502
	5.0137	12.8405	6.2783	4.9104	1.0871	2.5976
	13.8622	3.8823	6.7264	17.5371	14.8148	2.93502
Lactobacillus
	11.5722	0.9256	6.627	8.686	2.9121	3.2949
	3.1339	1.208	7.0899	21.0819	0.4098	16.8009
	0.7689	8.2007	1.9075	5.085	0.6345	23.2672
	1.9425	0.1437	3.8462	3.7541	6.0345	9.1216
	5.0137	7.5622	0.6443	7.9345	13.0457	3.9488
	13.0341	4.0042	2.671	5.2869	6.8085	21.775
[Eubacterium]_ coprostanoligenes_group	Normal control	Solvent control	CCl4	CCl4 + 10 mg/kg PHI	CCl4 + 20 mg/kg PHI	CCl4 + 40 mg/kg PHI
	0.5545	0.8246	7.2693	0	2.1718	0.7578
	0.1667	0.0525	1.8415	1.0218	0.7376	0.0911
	1.9467	0.3055	3.689	0.4637	0.6537	1.2061
	2.0568	4.1035	0.8814	0.2816	0.0704	3.9634
	2.1903	1.3365	3.2045	1.2783	0.0167	1.0392
	0.8943	0.0522	1.3518	0.2095	1.0244	1.4897
uncultured_bacterium_g_ Ruminococcaceae_UCG-014	Normal control	Solvent control	CCl4	CCl4 + 10 mg/kg PHI	CCl4 + 20 mg/kg PHI	CCl4 + 40 mg/kg PHI
	8.53157	1.68294	4.99765	1.78459	17.3412	4.46458
	4.68411	5.12955	1.96653	7.94891	12.9159	2.91603
	11.3038	5.06512	0.701818	2.27203	10.6518	4.16483
	4.48906	11.2087	5.01603	8.74394	8.77903	3.72502
	5.01369	12.8405	6.27833	4.91037	1.08714	6.5976
	13.8622	3.88231	6.72638	17.5371	14.8148	7.54349
uncultured_bacterium _g_[Eubacterium] _coprostanoligenes_group	Normal control	Solvent control	CCl4	CCl4 + 10 mg/kg PHI	CCl4 + 20 mg/kg PHI	CCl4 + 40 mg/kg PHI
	0.2791	0.824638	3.58941	1.24979	2.17177	0.757825
	0.554463	0.674202	7.26931	1.02179	0.737584	1.20611
	0.166694	0.052521	3.68904	0.463679	0.65372	1.03917
	1.94667	0.305515	0.88141	0.281558	0.070373	0.091144
	1.05681	1.33649	3.20448	1.27825	1.02443	0.016258
	0.894336	0.052228	1.35179	0.209542	0.076523	1.4897
