# Supplementary material for: Phillygenin Attenuates Carbon Tetrachloride-Induced Liver Fibrosis via Modulating Inflammation and Gut Microbiota
Source: Frontiers journal article supplement (doi:10.3389/fphar.2021.756924), 2021-09-21
Supplement: Data_Sheet_1.ZIP [file Iileum pathology.xlsx]

## Sheet: Sheet1
Villus height	Normal control	Solvent control	CCl4	CCl4 + 10 mg/kg PHI	CCl4 + 20 mg/kg PHI	CCl4 + 40 mg/kg PHI
	0.225942	0.184974	0.154134	0.18438	0.197783	0.178567
	0.175102	0.19572	0.153593	0.17755	0.16325	0.179931
	0.179608	0.182233	0.163263	0.166594	0.17193	0.190883
	0.173247	0.17849	0.163426	0.192578	0.159088	0.178572
	0.185068	0.182548	0.146921	0.153939	0.210185	0.183266
	0.193139	0.177392	0.152024	0.174441	0.16219	0.167935
Villus width	Normal control	Solvent control	CCl4	CCl4 + 10 mg/kg PHI	CCl4 + 20 mg/kg PHI	CCl4 + 40 mg/kg PHI
	0.076853	0.092811	0.060852	0.06712	0.087956	0.064607
	0.087119	0.083086	0.052796	0.059708	0.066015	0.073059
	0.098539	0.07837	0.050079	0.060497	0.0799	0.085572
	0.072901	0.098393	0.060187	0.060354	0.068408	0.063282
	0.076591	0.088318	0.055182	0.063621	0.065205	0.063463
	0.083206	0.077615	0.05552	0.064161	0.069574	0.079064
Crypt depth	Normal control	Solvent control	CCl4	CCl4 + 10 mg/kg PHI	CCl4 + 20 mg/kg PHI	CCl4 + 40 mg/kg PHI
	0.081796	0.08415	0.06549	0.065469	0.076871	0.076741
	0.080397	0.077634	0.063055	0.073587	0.077095	0.070964
	0.086457	0.075685	0.064642	0.074287	0.075894	0.075266
	0.080575	0.077449	0.066189	0.062895	0.072803	0.071689
	0.087498	0.083206	0.061228	0.076797	0.076741	0.073841
	0.07826	0.081427	0.066015	0.068135	0.074287	0.073353
