# Supplementary material for: Phillygenin Attenuates Carbon Tetrachloride-Induced Liver Fibrosis via Modulating Inflammation and Gut Microbiota
Source: Frontiers journal article supplement (doi:10.3389/fphar.2021.756924), 2021-09-21
Supplement: Data_Sheet_1.ZIP [file Immunohistochemistry.xlsx]

## Sheet: Sheet1
α-SMA H-Score	Normal control	Solvent control	CCl4	CCl4 + 10 mg/kg PHI	CCl4 + 20 mg/kg PHI	CCl4 + 40 mg/kg PHI
	10.223	12.153	51.582	42.012	9.804	16.255
	12.713	10.05	57.081	19.503	23.976	20.58
	10.764	12.589	57.841	33.271	22.919	23.816
	4.542	2.414	48.753	18.154	22.694	29.103
	5.994	3.277	61.043	46.784	23.891	30.677
	3.925	9.365	48.068	12.841	16.197	27.178
Collagen I H-Score	Normal control	Solvent control	CCl4	CCl4 + 10 mg/kg PHI	CCl4 + 20 mg/kg PHI	CCl4 + 40 mg/kg PHI
	7.673	11.225	57.028	12.67	11.496	15.466
	3.421	6.03	59.481	17.113	12.999	18.989
	3.727	8.778	36.228	25.686	17.732	9.945
	1.04	2.106	44.32	26.536	28.279	17.407
	3.843	2.911	35.851	11.465	21.399	24.752
	7.472	1.062	36.374	23.351	13.645	26.96
