# Supplementary material for: Phillygenin Attenuates Carbon Tetrachloride-Induced Liver Fibrosis via Modulating Inflammation and Gut Microbiota
Source: Frontiers journal article supplement (doi:10.3389/fphar.2021.756924), 2021-09-21
Supplement: Data_Sheet_1.ZIP [file Link.docx]

All original microscope images in the article are stored in the following link.

Link: <https://www.jianguoyun.com/p/DTViQ0sQwNvgCRiQnIcE>

Access password: Ck5sQQ
