# Supplementary material for: Phillygenin Attenuates Carbon Tetrachloride-Induced Liver Fibrosis via Modulating Inflammation and Gut Microbiota
Source: Frontiers journal article supplement (doi:10.3389/fphar.2021.756924), 2021-09-21
Supplement: Data_Sheet_1.ZIP [file Liver biochemistry.xlsx]

## Sheet: Sheet1
HYP	Normal control	Solvent control	CCl4	CCl4 + 10 mg/kg PHI	CCl4 + 20 mg/kg PHI	CCl4 + 40 mg/kg PHI
	53.4178	60.3602	150.913	120.848	119.643	161.375
	84.7942	70.678	197.345	161.96	115.848	102.728
	46.8519	70.7731	190.996	120.986	62.4717	99.9979
	64.8697	60.8392	162.332	123.279	107.692	112.209
	81.3731	68.5955	154.26	181.846	128.432	144.384
	53.1988	57.0783	148.169	123.544	122.158	137.806
HAase	Normal control	Solvent control	CCl4	CCl4 + 10 mg/kg PHI	CCl4 + 20 mg/kg PHI	CCl4 + 40 mg/kg PHI
	22.7399	24.8213	31.6496	28.09	27.7187	26.4354
	24.4321	23.6233	36.1908	29.2953	18.5988	24.9223
	21.9519	22.5279	27.5317	29.7269	24.0839	19.9794
	22.8672	23.0706	33.6006	29.6376	20.4975	27.6454
	22.5279	25.5505	30.0247	31.1095	24.054	23.9178
	22.1129	22.1129	28.2766	31.0791	26.1374	26.562
LN	Normal control	Solvent control	CCl4	CCl4 + 10 mg/kg PHI	CCl4 + 20 mg/kg PHI	CCl4 + 40 mg/kg PHI
	75.0814	84.4583	106.718	91.8657	69.3702	91.7284
	77.775	80.603	113.528	109.088	82.3943	73.0689
	82.1202	81.5563	104.218	108.155	73.0624	94.8749
	82.6562	79.8584	114.076	98.2592	91.5899	95.5585
	72.8703	78.7882	100.965	102.926	76.677	92.8867
	80.138	75.5021	101.922	104.651	89.0515	80.0303
PC III	Normal control	Solvent control	CCl4	CCl4 + 10 mg/kg PHI	CCl4 + 20 mg/kg PHI	CCl4 + 40 mg/kg PHI
	7.11777	8.75471	10.4404	9.46702	6.13285	8.2966
	7.88034	8.52077	11.1342	8.21332	6.85727	7.84364
	7.52294	7.1993	9.5808	9.15015	5.87062	6.62966
	8.03529	8.15623	10.981	8.33343	8.69072	8.16555
	7.38088	7.55318	9.23853	8.94841	6.97226	8.25849
	6.69708	8.2609	9.00054	9.02925	8.71055	7.17864
IV-C	Normal control	Solvent control	CCl4	CCl4 + 10 mg/kg PHI	CCl4 + 20 mg/kg PHI	CCl4 + 40 mg/kg PHI
	4.35455	4.97457	6.39078	5.94566	3.67336	4.77687
	4.1257	3.72607	5.11091	5.60204	4.51376	3.74766
	4.27705	4.36756	6.31107	5.68089	3.74107	5.0117
	4.20845	4.89605	5.55168	5.05168	5.16514	4.56733
	3.72607	4.51842	5.88348	4.91326	3.72132	4.67441
	4.34249	4.48619	4.85318	5.33615	4.71875	3.9323
