# Supplementary material for: Phillygenin Attenuates Carbon Tetrachloride-Induced Liver Fibrosis via Modulating Inflammation and Gut Microbiota
Source: Frontiers journal article supplement (doi:10.3389/fphar.2021.756924), 2021-09-21
Supplement: Data_Sheet_1.ZIP [file RT-qPCR.xlsx]

## Sheet: Sheet1
α-SMA	Solvent control	CCl4	CCl4 + 10 mg/kg PHI	CCl4 + 20 mg/kg PHI	CCl4 + 40 mg/kg PHI
	1.02418	3.24538	1.81427	1.39633	1.31154
	1.01832	2.92215	1.95596	1.50956	1.43535
	0.992238	3.01192	1.95765	1.50211	1.40748
	0.974988	2.76267	2.5283	1.43759	1.56568
	0.978815	3.0083	2.64746	1.80215	1.46107
	1.01257	2.80973	2.45243	1.70827	1.40317
Collagen I	Solvent control	CCl4	CCl4 + 10 mg/kg PHI	CCl4 + 20 mg/kg PHI	CCl4 + 40 mg/kg PHI
	1.10899	3.06533	2.22478	2.029	2.36536
	1.24479	4.41316	2.58168	2.10444	2.56988
	1.19237	4.70481	2.47214	1.6765	2.58093
	0.89989	4.44759	2.8252	2.39893	1.74596
	0.899576	3.90398	3.17089	2.14696	1.97988
	0.750475	4.06104	2.97661	2.46608	1.69722
IL-1β	Solvent control	CCl4	CCl4 + 10 mg/kg PHI	CCl4 + 20 mg/kg PHI	CCl4 + 40 mg/kg PHI
	1.14499	2.25421	2.22772	1.4876	1.14646
	1.12742	2.14584	2.12313	1.66166	1.57358
	1.23686	2.44163	2.10285	1.48063	1.58673
	0.8458	2.72746	1.88651	1.74527	1.16582
	0.87811	2.29679	1.72531	1.95672	1.18548
	0.843287	2.66019	1.81676	1.83168	1.20941
IL-6	Solvent control	CCl4	CCl4 + 10 mg/kg PHI	CCl4 + 20 mg/kg PHI	CCl4 + 40 mg/kg PHI
	1.13708	2.8119	2.57678	1.56628	1.54651
	1.11963	2.78532	2.42199	1.4914	1.46492
	1.19473	2.57733	2.39886	1.50506	1.47654
	0.839957	2.70862	2.15207	1.33989	1.35654
	0.872045	2.80814	1.96817	1.38873	1.37826
	0.897569	2.64182	2.0725	1.33393	1.40468
TNF-α	Solvent control	CCl4	CCl4 + 10 mg/kg PHI	CCl4 + 20 mg/kg PHI	CCl4 + 40 mg/kg PHI
	0.962708	2.54701	1.98326	1.14169	1.58966
	1.19806	2.15723	2.11713	1.18721	1.42577
	1.18701	2.41187	1.97257	1.32996	1.36898
	0.940772	1.84212	1.24291	1.39877	1.27784
	0.950041	1.90594	1.44469	1.18618	1.10265
	0.817233	1.96915	1.40687	1.46451	1.21148
ZO-1	Solvent control	CCl4	CCl4 + 10 mg/kg PHI	CCl4 + 20 mg/kg PHI	CCl4 + 40 mg/kg PHI
	0.931842	0.450984	0.949061	1.16408	1.02399
	0.998225	0.474996	1.11751	1.1884	1.24974
	0.740065	0.630386	0.861826	0.994076	1.04692
	1.13482	0.586839	0.941945	1.10778	1.27914
	1.0537	0.530507	0.912906	1.13464	0.758785
	1.21483	0.512455	1.1404	1.07505	1.03691
Occludin	Solvent control	CCl4	CCl4 + 10 mg/kg PHI	CCl4 + 20 mg/kg PHI	CCl4 + 40 mg/kg PHI
	1.1753	0.599147	0.894015	1.21355	0.82978
	1.01365	0.66271	0.920442	1.07784	0.821925
	0.918804	0.673541	0.843067	1.25251	0.889111
	0.924264	0.587796	0.948254	0.948645	0.767596
	0.880735	0.524529	0.802131	0.956502	0.810391
	1.12227	0.572561	0.896247	0.894517	0.763529
Occludin	Solvent control	CCl4	CCl4 + 10 mg/kg PHI	CCl4 + 20 mg/kg PHI	CCl4 + 40 mg/kg PHI
	0.96044	0.799335	0.927425	1.20737	1.06117
	1.08207	0.818648	0.886827	1.09282	0.984996
	0.973036	0.78593	0.785766	1.38357	0.953132
	0.849708	0.653138	0.716274	1.21253	0.884242
	1.00346	0.648545	0.832982	1.25648	0.863802
	1.15978	0.598738	0.864643	1.23051	0.994644
