# Supplementary material for: Phillygenin Attenuates Carbon Tetrachloride-Induced Liver Fibrosis via Modulating Inflammation and Gut Microbiota
Source: Frontiers journal article supplement (doi:10.3389/fphar.2021.756924), 2021-09-21
Supplement: Data_Sheet_1.ZIP [file Serum biochemistry.xlsx]

## Sheet: Sheet1
ALT	Normal control	Solvent control	CCl4	CCl4 + 10 mg/kg PHI	CCl4 + 20 mg/kg PHI	CCl4 + 40 mg/kg PHI
	5.01876	3.38765	55.3665	26.9638	12.7019	5.44457
	5.87676	4.80837	83.97	16.5411	14.2166	9.76741
	8.82088	6.75896	86.7282	16.2799	10.9737	4.80837
	8.35422	5.44457	92.9205	10.9737	11.709	8.58698
	7.89222	8.35422	91.4645	12.2037	11.2179	8.58698
	5.01876	8.12262	79.5058	26.6776	13.4556	8.58698
AST	Normal control	Solvent control	CCl4	CCl4 + 10 mg/kg PHI	CCl4 + 20 mg/kg PHI	CCl4 + 40 mg/kg PHI
	10.483	9.3589	34.0925	11.9559	9.91368	11.4668
	9.91368	7.94401	24.6018	15.5005	10.2916	7.20839
	8.64034	7.77315	28.9334	13.2035	12.2876	10.4882
	7.26783	10.483	33.413	17.5932	9.72718	12.7019
	9.17706	8.81781	21.6978	10.7305	13.1407	13.7084
	9.72718	10.2916	35.1723	17.3292	12.71	14.4718
ALP	Normal control	Solvent control	CCl4	CCl4 + 10 mg/kg PHI	CCl4 + 20 mg/kg PHI	CCl4 + 40 mg/kg PHI
	0.991189	0.957816	3.59431	1.52516	2.15926	1.49179
	1.39167	0.790949	4.12829	1.99239	1.99239	1.39167
	0.924443	1.09131	5.12949	2.52636	1.25818	1.15806
	1.29155	0.891069	2.99359	2.09251	0.957816	1.05794
	1.45842	1.32492	4.22841	1.59191	0.957816	0.991189
	1.25818	1.39167	3.06034	2.65986	1.69203	1.89227
γ-GT	Normal control	Solvent control	CCl4	CCl4 + 10 mg/kg PHI	CCl4 + 20 mg/kg PHI	CCl4 + 40 mg/kg PHI
	1.6	1.33333	2.93333	1.86667	1.6	1.6
	1.6	1.6	2.66667	1.6	1.6	1.33333
	1.6	1.6	2.66667	1.86667	1.86667	1.6
	1.6	1.86667	2.13333	1.33333	0.8	1.6
	1.33333	1.86667	3.46667	2.4	1.86667	1.86667
	1.33333	1.6	2.66667	1.06667	2.13333	1.33333
LPS	Normal control	Solvent control	CCl4	CCl4 + 10 mg/kg PHI	CCl4 + 20 mg/kg PHI	CCl4 + 40 mg/kg PHI
	33.4978	36.5078	41.2737	39.267	34.6683	36.1734
	34.2503	29.2336	41.6081	39.3506	34.1667	37.8456
	34.1667	30.2369	40.0195	38.8489	36.8422	33.2469
	32.4108	30.7386	37.762	35.5881	37.1767	38.8489
	30.9058	27.0596	36.5914	33.0797	35.9225	34.3339
	30.4041	32.7453	36.675	39.9359	33.665	33.9158
MIP-1	Normal control	Solvent control	CCl4	CCl4 + 10 mg/kg PHI	CCl4 + 20 mg/kg PHI	CCl4 + 40 mg/kg PHI
	748.103	705	832.586	808.448	787.759	813.621
	706.724	725.69	817.069	799.828	787.759	798.103
	715.345	711.897	858.448	777.414	805	770.517
	725.69	715.345	858.448	773.966	799.828	810.172
	710.172	753.276	813.621	808.448	748.103	725.69
	705	729.138	822.241	815.345	815.345	782.586
TNF-α	Normal control	Solvent control	CCl4	CCl4 + 10 mg/kg PHI	CCl4 + 20 mg/kg PHI	CCl4 + 40 mg/kg PHI
	4.12835	8.56437	69.3776	49.386	42.4995	35.4835
	19.0951	11.6057	66.459	49.3707	46.3325	31.5075
	15.6057	18.0356	65.7272	53.5105	40.9542	33.1055
	5.19219	4.90866	64.261	55.5714	43.2694	24.1657
	15.6057	9.23324	50.9542	55.5714	45.5692	33.9006
	11.9963	13.4527	53.2694	53.8079	36.2715	44.0377
